# Supplementary material for: An optrode array for spatiotemporally-precise large-scale optogenetic stimulation of deep cortical layers in non-human primates
Source: Springer Nature journal article supplement (doi:10.1038/s42003-024-05984-2), 2024-03-14
Supplement: 42003_2024_5984_MOESM3_ESM.pdf [file 42003_2024_5984_MOESM3_ESM.pdf]

## **Description of Additional Supplementary Files**

**File name:** Supplementary Data

**Description:** Source data file for figures and Supplementary figures.
